# Supplementary material
Source: publisher figshare collection journal article supplement (https://frontiersin.figshare.com/ndownloader/files/23920697)
Supplement: Supplementary file [file 23920697]

## Supplementary Material

Capsule Protects *Acinetobacter baumannii* From Inter-Bacterial Competition Mediated by CdiA Toxin

Renatas Krasauskas<sup>1\*</sup>, Jūratė Skerniškytė<sup>1</sup>, Julius Martinkus<sup>1</sup>, Julija Armalytė<sup>1</sup>, Edita Sužiedėlienė<sup>1</sup>

<sup>1</sup>Institute of Biosciences, Life Sciences Center, Vilnius University, Vilnius, Lithuania

## \* Correspondence:

Renatas Krasauskas

[renatas.krasauskas@gf.vu.lt](mailto:renatas.krasauskas@gf.vu.lt)

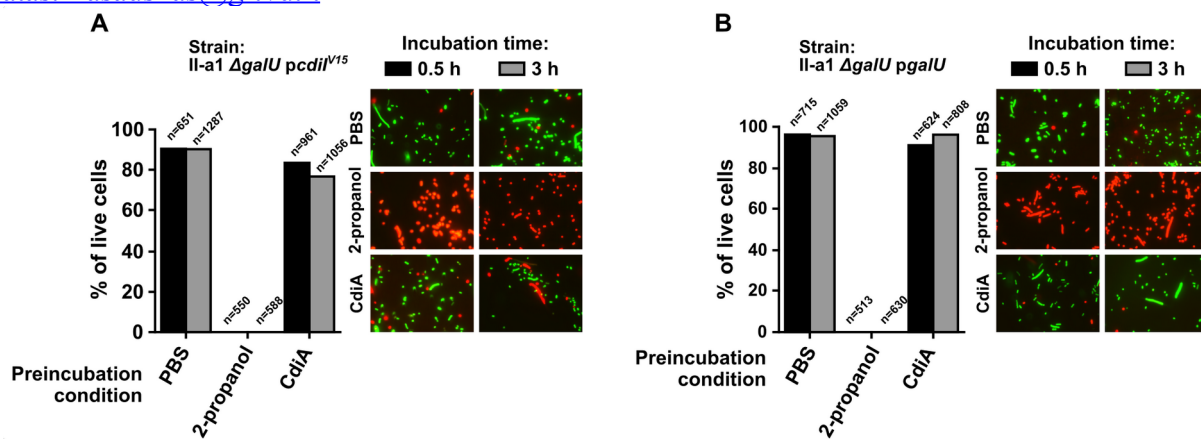

**Supplementary Figure S4.** Live/dead assays performed with the *galU* mutant of *A. baumannii* clinical strain II-a1, complemented with plasmids *pcdiI*<sup>V15</sup> (A) and *pgalU* (B), encoding either immunity gene from the *A. baumannii* V15 strain or wild-type *galU* gene, respectively. Graphs display the percentage of live cells. Bacteria before each assay were treated for 30 minutes or 3 hours with either PBS (live control), 2-propanol (dead control), or the purified CdiA. Treated bacteria were visualized at 1000x magnification with a fluorescence microscope Olympus AX70 equipped with 100x/1.35 oil immersion lens and WIBA (460–490 nm for excitation and 515–550 nm for emission) and MWG (510-550/590) filter cubes for SYTO9 and propidium iodide, respectively. Representative images of stained cells from each live/dead assay are provided next to graphs. Displayed data are from two separate biological replicates with similar outcomes. Numbers above columns indicate total number of bacterial cells counted.
